# Supplementary material
Source: HighWire-hosted journal article supplement (http://www.jneurosci.org/highwire/filestream/599689/field_highwire_adjunct_files/2/Figure_S3.pdf)
Supplement: Figure_S3.pdf [file Figure_S3.pdf]

## Supplemental Figure 3

### Comparison of dendrites from mice genetically altered at a single locus

| Cell Parameter                     | GluR1 <sup>+/+</sup> (n=10) | Hb9-Cre (n=10) | GluR1 <sup>loxP/loxP</sup> (n=10) | F (2,27) , P     |
|------------------------------------|-----------------------------|----------------|-----------------------------------|------------------|
| Soma area ( $\mu\text{m}^2$ )      | 1500 $\pm$ 397              | 1503 $\pm$ 323 | 1598 $\pm$ 556                    | 0.1632; 0.8502   |
| 1 <sup>o</sup> dendrites           | 6.4 $\pm$ 0.7               | 6.3 $\pm$ 1.2  | 5.9 $\pm$ 1.1                     | 0.6898; 5.103    |
| Branches, #                        | 22.5 $\pm$ 11.1             | 21.8 $\pm$ 6.5 | 19.9 $\pm$ 9.7                    | 0.2075; 0.8139   |
| $\Sigma$ length ( $\mu\text{m}$ )  | 3510 $\pm$ 1273             | 3674 $\pm$ 678 | 3361 $\pm$ 886                    | 0.2557; 0.7763   |
| Average dendrites                  | 551 $\pm$ 205               | 594 $\pm$ 132  | 573 $\pm$ 122                     | 0.1914; 0.8269   |
| Longest dendrite ( $\mu\text{m}$ ) | 467 $\pm$ 63                | 464 $\pm$ 58   | 466 $\pm$ 37                      | 0.008803; 0.9912 |
